# Supplementary material
Source: Springer Nature journal article supplement (https://www.springermedizin.de/resource/supplementary/12933_2011_370_MOESM3_ESM.pdf/9538298)

**A**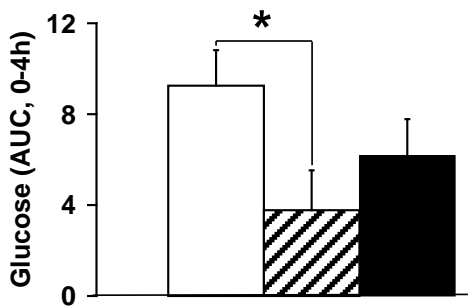**B**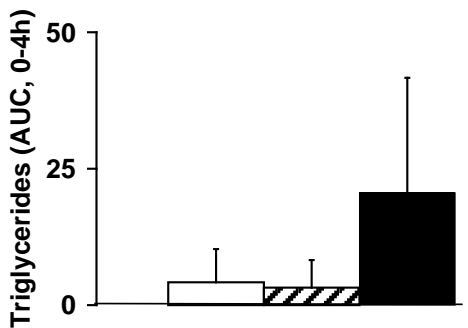**C**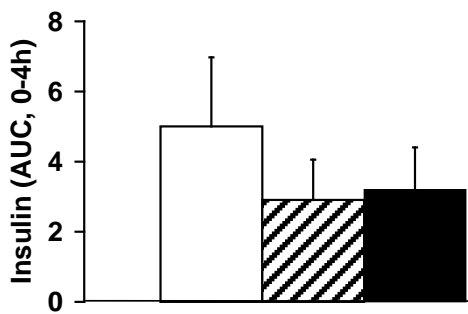

Supplement: MOESM3 [file 9538298]
